# Supplementary material for: LINC00355:8 promotes cell proliferation and migration with invasion via the MiR-6777-3p/Wnt10b axis in Hepatocellular Carcinoma
Source: PubMed Central journal article supplement (PMC7477441; doi:10.7150/jca.43831), 2020-07-25
Supplement: jcav11p5641s1.pdf [file jcav11p5641s1.pdf]

Table S1 Characteristics of HCC patients

| <b>Parameter</b> | <b>Number of patients</b> |
|------------------|---------------------------|
| Age (years)      |                           |
| $\leq 40$        | 1                         |
| 40-60            | 3                         |
| $\geq 60$        | 6                         |
| Gender           |                           |
| Male             | 7                         |
| Female           | 3                         |
| HBV infection    |                           |
| Yes              | 7                         |
| No               | 3                         |
| Tumor size (cm)  |                           |
| $< 5$            | 6                         |
| $\geq 5$         | 4                         |
| TNM stage        |                           |
| I-II             | 7                         |
| III-IV           | 3                         |
| Liver Cirrhosis  |                           |
| Yes              | 5                         |
| No               | 5                         |

Abbreviations: HBV, hepatitis B virus; TNM, tumor node metastasis.

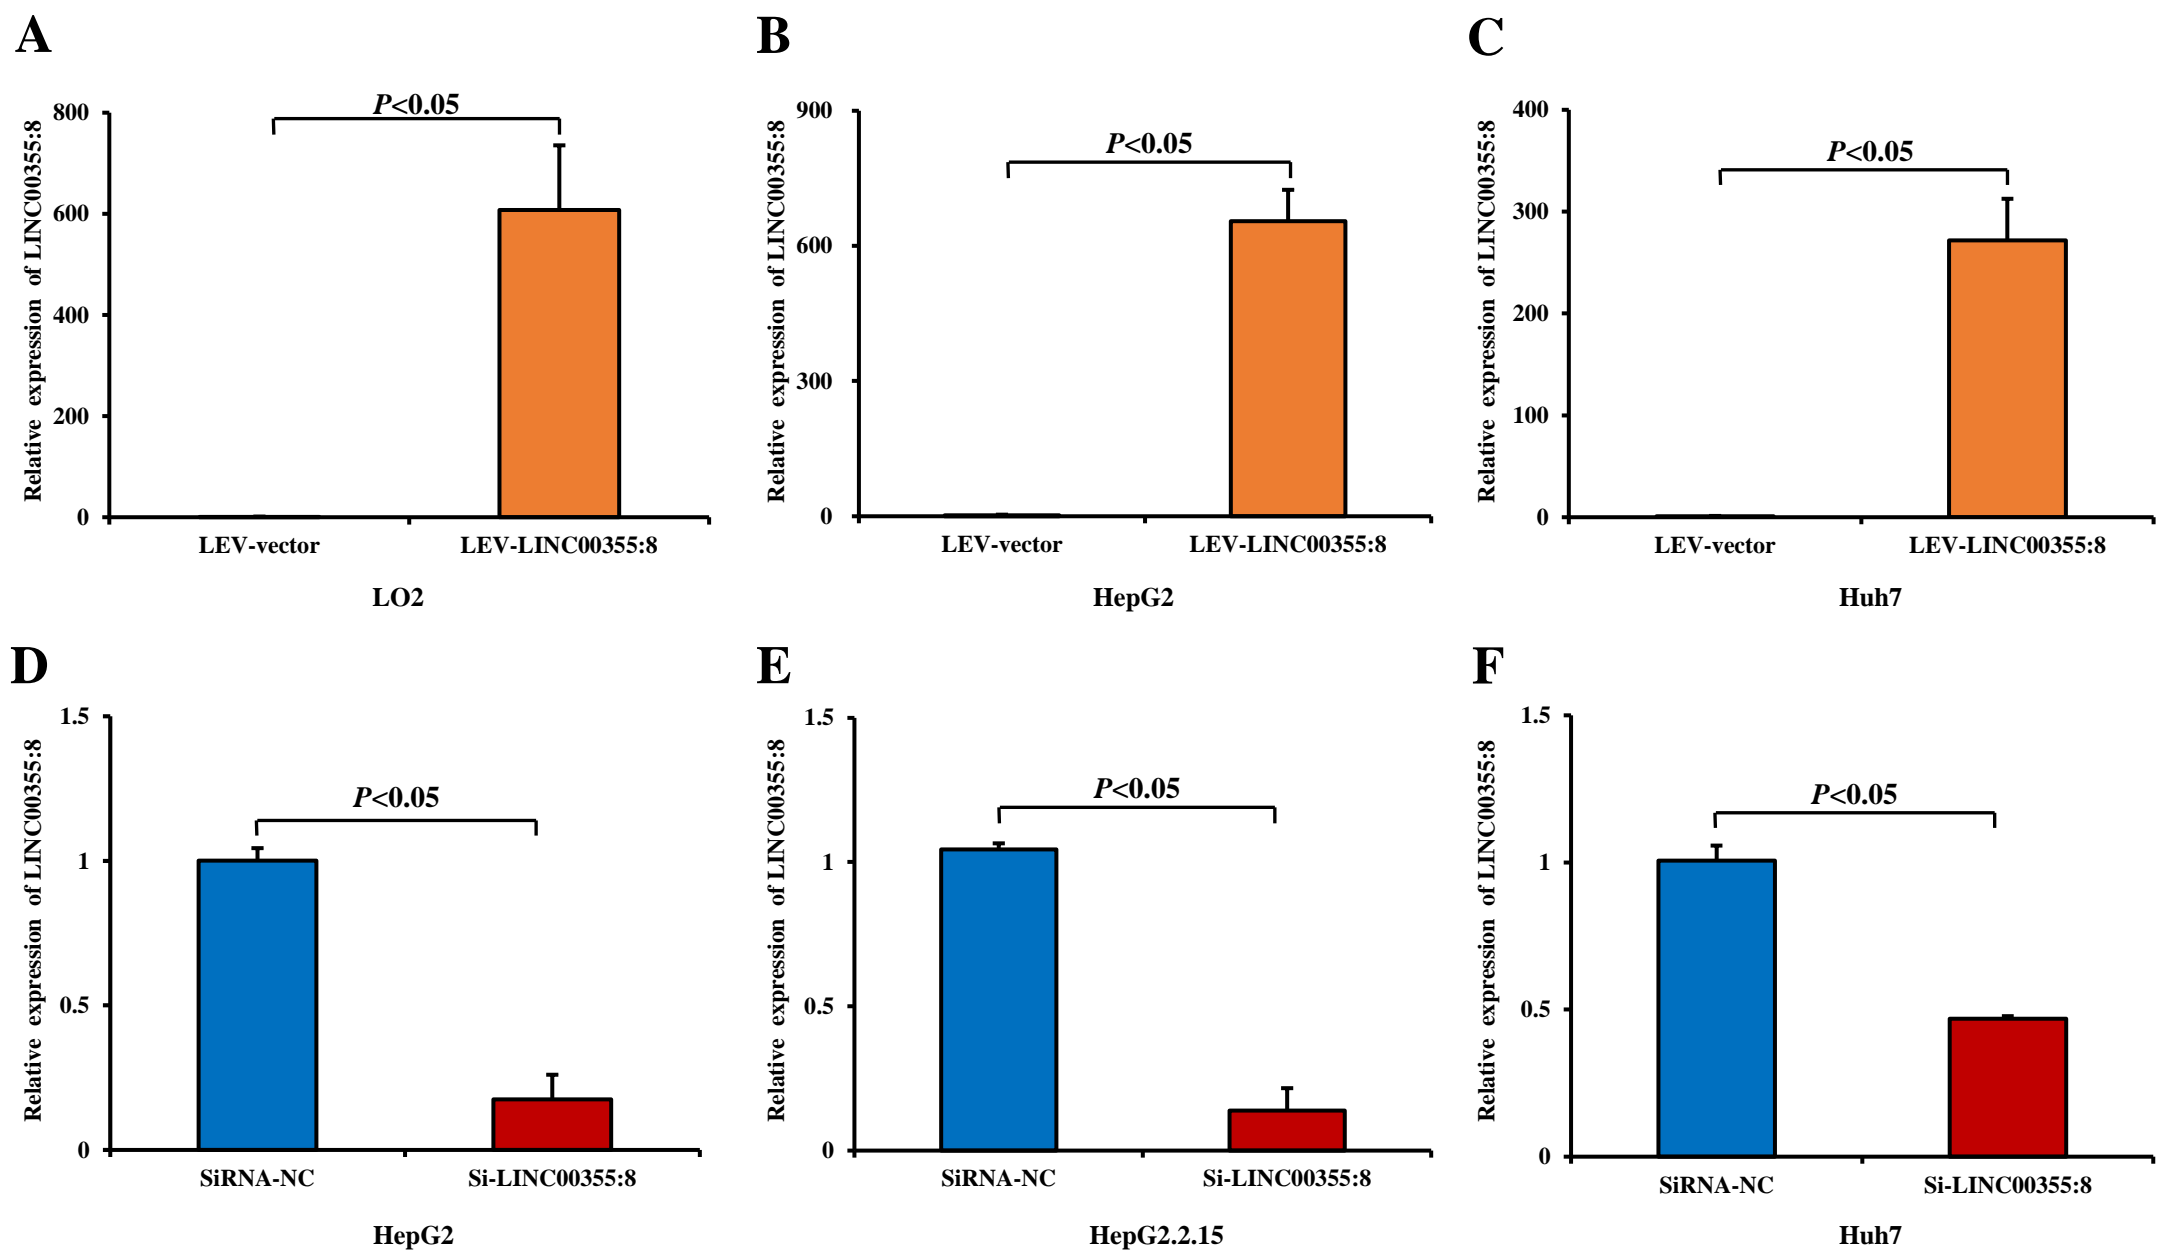

**Figure S1. The transfection efficiencies were measured in LO2, HepG2, Huh7 and HepG2.2.15 cells by qRT-PCR. A-C.** The expression level of LINC00355:8 is increased after transfection with LINC00355:8 lentiviruses in LO2, HepG2 and Huh7 cells. **D-F.** The expression level of LINC00355:8 was decreased after transfection with LINC00355:8 siRNA in HepG2 HepG2.2.15 and Huh7 cells. Error bars represent the mean  $\pm$  SD of at least three experiments.  $P < 0.05$  by using Student's *t*-test.
